# Supplementary material for: Microalgae Inoculation Significantly Shapes the Structure, Alters the Assembly Process, and Enhances the Stability of Bacterial Communities in Shrimp-Rearing Water
Source: Biology (Basel). 2024 Jan 19;13(1):54. doi: 10.3390/biology13010054 (PMC10813777; doi:10.3390/biology13010054)
Supplement: Supplementary file 1 [file biology-13-00054-s001.zip › Supplementary Table S1.xlsx]

## Sheet: 改
Table S1. Mean values and significance of alpha-diversity indices between different groups and lifestyles
	shannon_2	equitability	simpson	richness	the number of reads (sequences)
C_FL	5.299±1.301 a	0.505±0.117 a	0.134±0.134 cd	1302.750±263.113 ab	167708.000±72213.979ab
N_FL	5.368±1.206 ab	0.522±0.109 a	0.124±0.104 cd	1243.333±246.398 ab	131259.417±48408.699cd
T_FL	5.281±0.970 a	0.512±0.087 a	0.111±0.069 d	1267.542±186.348 ab	179833.333±58375.282a
M_FL	5.068±1.308 a	0.494±0.121 a	0.143±0.124 d	1210.208±220.534 ab	145723.167±48486.102bc
C_PA	6.099±0.783 c	0.588±0.066 b	0.063±0.043 ab	1339.750±252.619 b	194538.417±73363.176a
N_PA	6.288±1.002 c	0.619±0.085 b	0.055±0.049 a	1157.417±297.005 a	109574.708±36168.902d
T_PA	6.283±0.585 c	0.607±0.052 b	0.052±0.034 a	1316.292±170.398 b	185340.958±62285.315a
M_PA	5.976±1.198 bc	0.587±0.112 b	0.084±0.084 abc	1157.625±180.008 a	113260.542±63893.441cd
Note: The 192 samples were categorized into 8 groups based on both group and lifestyle. One-way ANOVA was used to test the significant differences. Different letters indicate significant differences (p<0.05).
