# Supplementary material for: Microalgae Inoculation Significantly Shapes the Structure, Alters the Assembly Process, and Enhances the Stability of Bacterial Communities in Shrimp-Rearing Water
Source: Biology (Basel). 2024 Jan 19;13(1):54. doi: 10.3390/biology13010054 (PMC10813777; doi:10.3390/biology13010054)
Supplement: Supplementary file 1 [file biology-13-00054-s001.zip › Supplementary Table S2.xlsx]

## Sheet: sheet
Table S2. Pairwise comparison of bacterial community of each group on the first day based on MRPP, ANOSIM and Adnois.
	MRPP			ANOSIM		Adonis
	δ	P	r		P	F. Model	P
C_PA/N_PA	0.45	0.1	1		0.1	13.27	0.1
C_PA/T_PA	0.47	0.1	1		0.1	14.08	0.1
C_PA/M_PA	0.45	0.1	1		0.1	13.88	0.1
N_PA/T_PA	0.54	0.1	1		0.1	24.26	0.1
N_PA/M_PA	0.49	0.1	1		0.1	17.85	0.1
T_PA/M_PA	0.17	0.1	0.67		0.1	3.42	0.1
C_FL/N_FL	0.35	0.1	1		0.1	8.04	0.1
C_FL/T_FL	0.29	0.1	1		0.1	6.13	0.1
C_FL/M_FL	0.3	0.1	1		0.1	6.46	0.1
N_FL/T_FL	0.37	0.1	1		0.1	9.38	0.1
N_FL/M_FL	0.32	0.1	1		0.1	7.02	0.1
T_FL/M_FL	0.06	0.3	0.19		0.3	1.75	0.2
